# Supplementary material for: SERS tags derived from silver nanoparticles and aryl diazonium salts for cell Raman imaging
Source: Royal Society of Chemistry journal article supplement (doi:10.1039/d1nr03148a), 2022-01-01
Supplement: d1nr03148a2.xlsx [file d1nr03148a2.xlsx]

## Sheet: 1) Cytotoxicity replicate 1
Cytotoxicity assay Hela cells in 96 wells plate 3 technical replicates
Replicate 1
RAW DATA			µg /ml
			40	20	10	5	2.5	1.25	0.625	0.3125	0.15625	No treatment	Blank,
Fluorescence Intensity Ex 530 nm / Em 590 nm		Ag@CCH	23427756	13225317	37523248	34677780	39827436	44874832	46434496	49238708	44823812	44862271	18398
			13459661	21803824	34954640	34472188	39047924	46494828	46715192	47374532	47895612	49836481	41291
			21386912	26463742	39709152	33452164	36938044	41623212	42543668	43428392	44899432	46064792	44801
		Ag@CN	8606500	28208504	31596936	36740300	36509060	47019664	46517324	44663944	49938196	4.69212e+07	34830	Mean
			3286346	24756856	34870860	33832576	36792196	44345864	46782744	45004012	46266276
			4905154	25102420	31900842	34395824	38189860	41507192	42803104	45158968	47729124
		Ag@NO2	18111892	21417490	25202102	28758864	26092108	29579642	30539070	29020824	30144582	30356678	22221
			15306254	20893670	27711650	29112380	24465096	26585622	26508500	26377498	27564708	28556026	10947
			16161699	21105612	25438324	24644226	21705072	26712216	24478592	26380974	25649558	33157525	60325
		Ag@CN@NO2@CCH	20152690	22572734	30727798	31360924	23541900	28062564	30659518	32317832	27138616	3.06901e+07	32308.2	Mean
			18634486	28192526	30406084	29895398	25073588	29596054	31715852	35558480	32364352
			21115404	24816224	29570590	33342322	25376448	33954204	32826416	36371716	33238168
			µg /ml
Mean Blank removal			40	20	10	5	2.5	1.25	0.625	0.3125	0.15625
Fluorescence Intensity Ex 530 nm / Em 590 nm		Ag@CCH	23392926	13190487	37488418	34642950	39792606	44840002	46399666	49203878	44788982
			13424831	21768994	34919810	34437358	39013094	46459998	46680362	47339702	47860782
			21352082	26428912	39674322	33417334	36903214	41588382	42508838	43393562	44864602
		Ag@CN	8571670	28173674	31562106	36705470	36474230	46984834	46482494	44629114	49903366
			3251516	24722026	34836030	33797746	36757366	44311034	46747914	44969182	46231446
			4870324	25067590	31866012	34360994	38155030	41472362	42768274	45124138	47694294
		Ag@NO2	18079584	21385182	25169794	28726556	26059800	29547334	30506762	28988516	30112274
			15273946	20861362	27679342	29080072	24432788	26553314	26476192	26345190	27532400
			16129391	21073304	25406016	24611918	21672764	26679908	24446284	26348666	25617250
		Ag@CN@NO2@CCH	20120382	22540426	30695490	31328616	23509592	28030256	30627210	32285524	27106308
			18602178	28160218	30373776	29863090	25041280	29563746	31683544	35526172	32332044
			21083096	24783916	29538282	33310014	25344140	33921896	32794108	36339408	33205860
Normalized to No treatment (%)			µg /ml
			40	20	10	5	2.5	1.25	0.625	0.3125	0.15625
Normalized viability (% of Control no treatment)		Ag@CCH	49.8558	28.112	79.8966	73.8322	84.8073	95.5645	98.8885	104.865	95.4558
			28.6115	46.3948	74.4223	73.3941	83.146	99.0171	99.4868	100.892	102.003
			45.5063	56.3262	84.5553	71.2201	78.6494	88.6346	90.5963	92.4818	95.6169
		Ag@CN	18.2682	60.0447	67.2662	78.2279	77.7351	100.136	99.0651	95.1151	106.356
			6.92974	52.6884	74.2437	72.0309	78.3385	94.4372	99.6307	95.8398	98.53
			10.3798	53.4249	67.9139	73.2313	81.3173	88.3873	91.1492	96.1701	101.648
		Ag@NO2	58.9102	69.6811	82.0128	93.6021	84.9128	96.2765	99.4027	94.4557	98.1173
			49.7684	67.9743	90.1899	94.754	79.6114	86.5208	86.2696	85.8427	89.7111
			52.5557	68.6649	82.7825	80.195	70.6182	86.9333	79.6553	85.854	83.4708
		Ag@CN@NO2@CCH	65.5599	73.4453	100.018	102.081	76.6032	91.3333	99.7952	105.199	88.3227
			60.613	91.7568	98.9694	97.3054	81.5941	96.33	103.237	115.758	105.35
			68.6968	80.7555	96.247	108.537	82.5809	110.531	106.856	118.408	108.197
Mean, SD and n			µg /ml
			40	20	10	5	2.5	1.25	0.625	0.3125	0.15625
Normalized viability (% of Control no treatment)	Ag@CCH	Mean	41.3245	43.611	79.6247	72.8155	82.2009	94.4054	96.3239	99.4129	97.6917
		SD	11.2226	14.3116	5.07196	1.39886	3.18592	5.28744	4.96924	6.32268	3.7341
		n	3	3	3	3	3	3	3	3	3
	Ag@CN	Mean	11.8593	55.386	69.808	74.4967	79.1303	94.32	96.615	95.7083	102.178
		SD	5.81222	4.05131	3.85511	3.2866	1.91786	5.87506	4.74197	0.53966	3.9397
		n	3	3	3	3	3	3	3	3	3
	Ag@NO2	Mean	53.7448	68.7734	84.9951	89.517	78.3808	89.9102	88.4425	88.7175	90.4331
		SD	4.68547	0.858564	4.51527	8.09361	7.22634	5.51721	10.0514	4.96943	7.3499
		n	3	3	3	3	3	3	3	3	3
	Ag@CN@NO2@CCH	Mean	64.9566	81.9859	98.4113	102.641	80.2594	99.3979	103.296	113.121	100.623
		SD	4.07552	9.21751	1.94627	5.63662	3.20454	9.95954	3.53066	6.98809	10.7474
		n	3	3	3	3	3	3	3	3	3

## Sheet: 2) Cytotoxicity Replicate 2
Cytotoxicity assay Hela cells in 96 wells plate 3 technical replicates
Replicate 2
RAW DATA			µg /ml
			40	20	10	5	2.5	1.25	0.625	0.3125	0.15625	No treatment	Blank,
Fluorescence Intensity Ex 530 nm / Em 590 nm		Ag@CCH	80908312	113258944	110317040	161179600	168499552	195227120	164561456	192256288	157491744	160271392	14641001
			96295720	101543816	107785800	159574976	161714736	198338736	181532128	203879904	187971776	163955136	13075991
			88166656	86176296	106978224	142325776	142645120	184122416	178999520	201981456	177580864	165085520	13208900
		Ag@CN	83305168	103053152	103432736	119643168	167545904	164019792	157798592	205817376	179864160	163104016	13641964	Mean
			101125504	94964392	103729680	111874824	129785224	174121088	171663600	208124176	207146512
			103613056	84648960	108397256	96155272	142018544	186868128	169757136	196514032	179562160
		Ag@NO2	121513552	122298632	114601032	142885056	161427968	168177568	168175504	163368880	165213136	No treatment	Blank,
			114141512	110705096	104645088	129957480	144271696	149612048	155376112	149057904	153992752	104935873	13282399
			117078096	101452728	91573688	115976080	131081680	137269328	149333744	137027744	177067232	137472752	13629178
		Ag@CN@NO2@CCH	87955400	83239144	71199032	97800688	109630280	103640968	91428688	93325896	126167376	124665710	13526356
			69522328	80575736	61993128	85132256	107039880	89544080	90293168	91695736	91545040	1.22358e+08	13479311	Mean
			66803316	69622176	61588048	77085776	88962392	85759264	79448680	76931328	75207144
			µg /ml
Mean Blank removal			40	20	10	5	2.5	1.25	0.625	0.3125	0.15625
Fluorescence Intensity Ex 530 nm / Em 590 nm		Ag@CCH	67266348	99616980	96675076	147537636	154857588	181585156	150919492	178614324	143849780
			82653756	87901852	94143836	145933012	148072772	184696772	167890164	190237940	174329812
			74524692	72534332	93336260	128683812	129003156	170480452	165357556	188339492	163938900
		Ag@CN	69663204	89411188	89790772	106001204	153903940	150377828	144156628	192175412	166222196
			87483540	81322428	90087716	98232860	116143260	160479124	158021636	194482212	193504548
			89971092	71006996	94755292	82513308	128376580	173226164	156115172	182872068	165920196
		Ag@NO2	108034241	108819321	101121721	129405745	147948657	154698257	154696193	149889569	151733825
			100662201	97225785	91165777	116478169	130792385	136132737	141896801	135578593	140513441
			103598785	87973417	78094377	102496769	117602369	123790017	135854433	123548433	163587921
		Ag@CN@NO2@CCH	74476089	69759833	57719721	84321377	96150969	90161657	77949377	79846585	112688065
			56043017	67096425	48513817	71652945	93560569	76064769	76813857	78216425	78065729
			53324005	56142865	48108737	63606465	75483081	72279953	65969369	63452017	61727833
Normalized to No treatment (%)			µg /ml
			40	20	10	5	2.5	1.25	0.625	0.3125	0.15625
Normalized viability (% of Control no treatment)		Ag@CCH	41.2414	61.0757	59.272	90.4562	94.9441	111.331	92.5296	109.509	88.1951
			50.6755	53.8931	57.7201	89.4724	90.7843	113.239	102.934	116.636	106.883
			45.6915	44.4712	57.225	78.8968	79.0926	104.523	101.382	115.472	100.512
		Ag@CN	42.7109	54.8185	55.0512	64.9899	94.3594	92.1975	88.3832	117.824	101.912
			53.6367	49.8592	55.2333	60.2271	71.2081	98.3907	96.884	119.238	118.639
			55.1618	43.5348	58.095	50.5894	78.7084	106.206	95.7151	112.12	101.727
		Ag@NO2	88.2935	88.9351	82.6441	105.76	120.914	126.431	126.429	122.501	124.008
			82.2685	79.46	74.5073	95.1945	106.893	111.258	115.968	110.805	114.838
			84.6685	71.8983	63.8244	83.7679	96.1133	101.17	111.03	100.973	133.696
		Ag@CN@NO2@CCH	60.8673	57.0128	47.1728	68.9136	78.5816	73.6867	63.7059	65.2565	92.0969
			45.8025	54.8361	39.649	58.56	76.4645	62.1657	62.7779	63.9242	63.801
			43.5803	45.8841	39.318	51.9839	61.6903	59.0725	53.915	51.8576	50.4485
Mean, SD and n			µg /ml
			40	20	10	5	2.5	1.25	0.625	0.3125	0.15625
Normalized viability (% of Control no treatment)	Ag@CCH	Mean	45.8695	53.1467	58.0724	86.2751	88.2736	109.697	98.9486	113.872	98.5299
		SD	4.71957	8.32739	1.06802	6.40872	8.21857	4.58192	5.61293	3.82304	9.50009
		n	3	3	3	3	3	3	3	3	3
	Ag@CN	Mean	50.5031	49.4042	56.1265	58.6021	81.4253	98.9314	93.6608	116.394	107.426
		SD	6.7912	5.6556	1.7072	7.33652	11.8124	7.01986	4.60768	3.76839	9.71121
		n	3	3	3	3	3	3	3	3	3
	Ag@NO2	Mean	85.0768	80.0978	73.6586	94.9074	107.974	112.953	117.809	111.426	124.181
		SD	3.03317	8.53629	9.43848	10.9988	12.4359	12.7153	7.86274	10.7774	9.43026
		n	9	9	9	9	9	9	9	9	9
	Ag@CN@NO2@CCH	Mean	50.0833	52.5777	42.0466	59.8192	72.2455	64.975	60.1329	60.3461	68.7822
		SD	9.40505	5.89812	4.44249	8.53482	9.20214	7.70149	5.40486	7.38135	21.2663
		n	3	3	3	3	3	3	3	3	3

## Sheet: 3) Cytotoxicity replicate 4
Cytotoxicity assay Hela cells in 96 wells plate 3 technical replicates
Replicate 3
RAW DATA			µg /ml
			40	20	10	5	2.5	1.25	0.625	0.3125	0.15625	No treatment	Blank,
Fluorescence Intensity Ex 530 nm / Em 590 nm		Ag@CCH	37478992	64193180	75709920	98035520	155414976	176982800	226314784	155998784	172608672	143170720	9148736
			67491856	61940136	74577056	94565688	147651088	166570128	151654816	161341024	172952304	133291256	8825388
			69388192	70031304	83189752	100522200	148088768	196121312	177211728	171283152	154415360	153765312	9100659
		Ag@CN	16849240	61282844	67416248	101910344	142796144	163651376	170699552	160771968	165649536	143409096	9.02493e+06	Mean
			14925223	73395896	70995432	110344704	154805744	158001920	166853376	196122736	142552624
			14540433	67521944	79467896	107815264	148389792	166257776	183040432	161127824	156018336
		Ag@NO2	24126762	60248672	74159256	73849408	133810896	142383856	166062784	163122016	151511568	159144864	8655858
			61309276	61367624	91969000	72584784	116189264	135985408	147888096	174583664	170857952	146651408	8819579
			57925192	77222048	105614752	107126272	131516176	142884976	168787728	152555104	167978080	155394832	11142932
		Ag@CN@NO2@CCH	69512936	89206024	90562104	124439736	154760192	183375248	167978080	191064592	174997888	153730368	9.53946e+06	Mean
			24464590	77093904	88764160	91849512	143973568	168701168	170100176	190306064	250053760
			23674280	92478440	99856528	91994728	128383288	182628960	186007920	189534512	207332064
			µg /ml
Mean Blank removal			40	20	10	5	2.5	1.25	0.625	0.3125	0.15625
Fluorescence Intensity Ex 530 nm / Em 590 nm		Ag@CCH	2.84541e+07	5.51683e+07	6.6685e+07	8.90106e+07	1.4639e+08	1.67958e+08	2.1729e+08	1.46974e+08	1.63584e+08
			5.84669e+07	5.29152e+07	6.55521e+07	8.55408e+07	1.38626e+08	1.57545e+08	1.4263e+08	1.52316e+08	1.63927e+08
			6.03633e+07	6.10064e+07	7.41648e+07	9.14973e+07	1.39064e+08	1.87096e+08	1.68187e+08	1.62258e+08	1.4539e+08
		Ag@CN	7.82431e+06	5.22579e+07	5.83913e+07	9.28854e+07	1.33771e+08	1.54626e+08	1.61675e+08	1.51747e+08	1.56625e+08
			5.9003e+06	6.4371e+07	6.19705e+07	1.0132e+08	1.45781e+08	1.48977e+08	1.57828e+08	1.87098e+08	1.33528e+08
			5.51551e+06	5.8497e+07	7.0443e+07	9.87903e+07	1.39365e+08	1.57233e+08	1.74016e+08	1.52103e+08	1.46993e+08
		Ag@NO2	1.45873e+07	5.07092e+07	6.46198e+07	6.431e+07	1.24271e+08	1.32844e+08	1.56523e+08	1.53583e+08	1.41972e+08
			5.17698e+07	5.18282e+07	8.24295e+07	6.30453e+07	1.0665e+08	1.26446e+08	1.38349e+08	1.65044e+08	1.61318e+08
			4.83857e+07	6.76826e+07	9.60753e+07	9.75868e+07	1.21977e+08	1.33346e+08	1.59248e+08	1.43016e+08	1.58439e+08
		Ag@CN@NO2@CCH	6.8559e+07	8.82521e+07	8.96082e+07	1.23486e+08	1.53806e+08	1.82421e+08	1.67024e+08	1.90111e+08	1.74044e+08
			2.35106e+07	7.614e+07	8.78102e+07	9.08956e+07	1.4302e+08	1.67747e+08	1.69146e+08	1.89352e+08	2.491e+08
			2.27203e+07	9.15245e+07	9.89026e+07	9.10408e+07	1.27429e+08	1.81675e+08	1.85054e+08	1.88581e+08	2.06378e+08
Normalized to No treatment (%)			µg /ml
			40	20	10	5	2.5	1.25	0.625	0.3125	0.15625
Normalized viability (% of Control no treatment)		Ag@CCH	19.8412	38.4691	46.4998	62.0676	102.079	117.118	151.517	102.486	114.068
			40.7693	36.8981	45.7099	59.6481	96.6648	109.857	99.4567	106.211	114.308
			42.0917	42.5401	51.7156	63.8016	96.97	130.463	117.278	113.144	101.382
		Ag@CN	5.45594	36.4398	40.7166	64.7695	93.2795	107.822	112.737	105.814	109.215
			4.11431	44.8863	43.2124	70.6509	101.654	103.883	110.055	130.464	93.1096
			3.84599	40.7903	49.1203	68.8871	97.1799	109.639	121.342	106.062	102.499
		Ag@NO2	9.48889	32.9858	42.0345	41.833	80.8373	86.4139	101.817	99.9039	92.3514
			33.6757	33.7137	53.6196	41.0103	69.3746	82.2518	89.9943	107.36	104.936
			31.4744	44.0268	62.496	63.4792	79.3446	86.7399	103.589	93.0302	103.063
		Ag@CN@NO2@CCH	44.5969	57.4071	58.2892	80.3262	100.049	118.663	108.647	123.665	113.214
			15.2934	49.5282	57.1196	59.1266	93.0328	109.118	110.028	123.172	162.037
			14.7793	59.5357	64.3351	59.2211	82.8915	118.178	120.376	122.67	134.247
Mean, SD and n			µg /ml
			40	20	10	5	2.5	1.25	0.625	0.3125	0.15625
Normalized viability (% of Control no treatment)	Ag@CCH	Mean	34.2341	39.3024	47.9751	61.8391	98.5712	119.146	122.751	107.28	109.919
		SD	12.4821	2.91185	3.26333	2.08616	3.04139	10.4518	26.4584	5.40878	7.39458
		n	3	3	3	3	3	3	3	3	3
	Ag@CN	Mean	4.47208	40.7054	44.3498	68.1025	97.3711	107.115	114.711	114.114	101.608
		SD	0.862543	4.22389	4.31575	3.01814	4.19045	2.94288	5.89702	14.1608	8.08971
		n	3	3	3	3	3	3	3	3	3
	Ag@NO2	Mean	24.8797	36.9088	52.7167	48.7742	76.5188	85.1352	98.4668	100.098	100.117
		SD	13.3742	6.17514	10.2606	12.7416	6.23194	2.50242	7.39071	7.16664	6.78987
		n	9	9	9	9	9	9	9	9	9
	Ag@CN@NO2@CCH	Mean	24.8899	55.4903	59.9146	66.2246	91.9912	115.32	113.017	123.169	136.499
		SD	17.0687	5.27188	3.87264	12.2124	8.62624	5.37635	6.41007	0.497657	24.4893
		n	3	3	3	3	3	3	3	3	3

## Sheet: 4) Cytotoxicity Replicate 4
Cytotoxicity assay Hela cells in 96 wells plate 3 technical replicates
Replicate 4
RAW DATA			µg /ml
			40	20	10	5	2.5	1.25	0.625	0.3125	0.15625	No treatment	Blank,
Fluorescence Intensity Ex 530 nm / Em 590 nm		Ag@		8468322	12253024	23058222	90666984	67116552	67524960	70653152	68816488	89500744	60870
				6787175	9170535	19039706	21631374	64390220	105614320	79085808	72058504	76182280	61951
				5812183	12051489	12152166	39015128	56676488	91318808	90430656	78708712	90523192	52301
		Ag@CCH		84454952	122773624	76526448	75359232	63981544	111620256	82841496	80391112	68835136	58374	Mean Blank
				84975568	92300112	80226584	100229248	71483520	110507872	85154168	72917112	81869440
				85008448	96271592	86220752	75502144	74319072	74188120	103321424	75766392	84097752	8.18348e+07	mean No treatment
		Ag@CN		46189172	105484032	93174360	161289904	104559984	124462680	105668920	82952688	82179504	5867714
				65863532	84846824	92189496	78213752	89039544	91880536	98857640	106189504	74094040	6003202
				44003720	82406528	83433048	75483824	77477112	84659336	88486440	82310928	78775640	6463302
		Ag@NO2		11171250	71132096	104171024	117669680	111658864	108669504	98144064	100707248	83095856	1.4656e+07	Mean Blank
				46160796	87270080	104711080	97963216	77709840	90069352	112310800	85684944	78911840
				45958020	10369771	97985400	97446256	93592600	114738392	92022272	83805960	76948080	7.90008e+07	mean No treatment
			µg /ml
Mean Blank removal			40	20	10	5	2.5	1.25	0.625	0.3125	0.15625
Fluorescence Intensity Ex 530 nm / Em 590 nm		Ag@		8409948	12194650	22999848	90608610	67058178	67466586	70594778	68758114
				6728801	9112161	18981332	21573000	64331846	105555946	79027434	72000130
				5753809	11993115	12093792	38956754	56618114	91260434	90372282	78650338
		Ag@CCH		84396578	122715250	76468074	75300858	63923170	111561882	82783122	80332738
				84917194	92241738	80168210	100170874	71425146	110449498	85095794	72858738
				84950074	96213218	86162378	75443770	74260698	74129746	103263050	75708018
		Ag@CN		3.15326e+07	9.08275e+07	7.85178e+07	1.46633e+08	8.99034e+07	1.09806e+08	9.10123e+07	6.82961e+07
				5.1207e+07	7.01902e+07	7.75329e+07	6.35572e+07	7.4383e+07	7.7224e+07	8.42011e+07	9.15329e+07
				2.93471e+07	6.775e+07	6.87765e+07	6.08272e+07	6.28205e+07	7.00028e+07	7.38299e+07	6.76544e+07
		Ag@NO2		-3.48533e+06	5.64755e+07	8.95144e+07	1.03013e+08	9.70023e+07	9.40129e+07	8.34875e+07	8.60507e+07
				3.15042e+07	7.26135e+07	9.00545e+07	8.33066e+07	6.30533e+07	7.54128e+07	9.76542e+07	7.10284e+07
				3.13014e+07	-4.28681e+06	8.33288e+07	8.27897e+07	7.8936e+07	1.00082e+08	7.73657e+07	6.91494e+07
Normalized to No treatment (%)			µg /ml
			40	20	10	5	2.5	1.25	0.625	0.3125	0.15625
Normalized viability (% of Control no treatment)		Ag@		10.2767	14.9016	28.1052	110.721	81.9434	82.4425	86.265	84.0207
				8.22242	11.1348	23.1947	26.3617	78.6119	128.987	96.5695	87.9823
				7.03101	14.6553	14.7783	47.6042	69.1859	111.518	110.433	96.1087
		Ag@CCH		103.13	149.955	93.442	92.0157	78.1125	136.326	101.159	98.1646
				103.767	112.717	97.9635	122.406	87.2797	134.966	103.985	89.0315
				103.807	117.57	105.288	92.1904	90.7447	90.5847	126.185	92.5133
		Ag@CN		39.9143	114.97	99.3886	185.61	113.801	138.994	115.204	86.4499
				64.8183	88.8475	98.1419	80.4513	94.1547	97.7508	106.583	115.863
				37.1479	85.7585	87.0579	76.9957	79.5188	88.6102	93.4545	85.6375
		Ag@NO2		-4.41176	71.4872	113.308	130.395	122.786	119.002	105.679	108.924
				39.8783	91.9149	113.992	105.45	79.8134	95.4582	123.612	89.9084
				39.6217	-5.42628	105.478	104.796	99.918	126.685	97.9302	87.5299
Mean, SD and n			µg /ml
			40	20	10	5	2.5	1.25	0.625	0.3125	0.15625
Normalized viability (% of Control no treatment)	Ag@	Mean		8.51006	13.5639	22.0261	61.5624	76.5804	107.649	97.7557	89.3706
		SD		1.64187	2.10723	6.73988	43.8779	6.61692	23.5121	12.1274	6.16244
		n		3	3	3	3	3	3	3	3
	Ag@CCH	Mean		103.568	126.747	98.8979	102.204	85.379	120.626	110.443	93.2365
		SD		0.379429	20.2443	5.97812	17.4958	6.52708	26.0251	13.706	4.60927
		n		3	3	3	3	3	3	3	3
	Ag@CN	Mean		47.2935	96.5254	94.8628	114.352	95.8247	108.452	105.08	95.9835
		SD		15.2398	16.0482	6.7879	61.7351	17.2018	26.8422	10.9524	17.2211
		n		9	9	9	9	9	9	9	9
	Ag@NO2	Mean		25.0294	52.6586	110.926	113.547	100.839	113.715	109.074	95.454
		SD		25.4971	51.3295	4.73026	14.5944	21.5013	16.2708	13.1729	11.7256
		n		3	3	3	3	3	3	3	3

## Sheet: 5) Histograms
Normalized viability (% of Control no treatment)
			Ag@
			Mean exp 4	SD exp 4	n exp 4
	µg /ml	40
		20	8.51006	1.64187	3
		10	13.5639	2.10723	3
		5	22.0261	6.73988	3
		2.5	61.5624	43.8779	3
		1.25	76.5804	6.61692	3
		0.625	107.649	23.5121	3
		0.3125	97.7557	12.1274	3
		0.15625	89.3706	6.16244	3
			Ag@CCH			Ag@CCH			Ag@CCH			Ag@CCH			Ag@CCH
			Mean exp 1	SD exp 1	n exp 1	Mean exp 2	SD exp 2	n exp 2	Mean exp 3	SD exp 3	n exp 3	Mean exp 4	SD exp 4	n exp 4	Mean all exp	SD all exp	n all exp
		40	41.3245	11.2226	3	45.8695	4.71957	3	34.2341	12.4821	3				40.476	10.0894	9
		20	43.611	14.3116	3	53.1467	8.32739	3	39.3024	2.91185	3	103.568	0.379429	3	59.9255	27.8163	12
		10	79.6247	5.07196	3	58.0724	1.06802	3	47.9751	3.26333	3	126.747	20.2443	3	78.1275	32.9667	12
		5	72.8155	1.39886	3	86.2751	6.40872	3	61.8391	2.08616	3	98.8979	5.97812	3	79.9745	15.1002	12
		2.5	82.2009	3.18592	3	88.2736	8.21857	3	98.5712	3.04139	3	102.204	17.4958	3	92.8307	11.8889	12
		1.25	94.4054	5.28744	3	109.697	4.58192	3	119.146	10.4518	3	85.379	6.52708	3	102.172	14.9448	12
		0.625	96.3239	4.96924	3	98.9486	5.61293	3	122.751	26.4584	3	120.626	26.0251	3	109.684	20.5101	12
		0.3125	99.4129	6.32268	3	113.872	3.82304	3	107.28	5.40878	3	110.443	13.706	3	107.772	8.98795	12
		0.15625	97.6917	3.7341	3	98.5299	9.50009	3	109.919	7.39458	3	93.2365	4.60927	3	99.8609	8.59305	12						Ag@
			Ag@CN			Ag@CN			Ag@CN			Ag@CN			Ag@CN
			Mean exp 1	SD exp 1	n exp 1	Mean exp 2	SD exp 2	n exp 2	Mean exp 3	SD exp 3	n exp 3	Mean exp 4	SD exp 4	n exp 4	Mean all exp	SD all exp	n all exp
		40	11.8593	5.81222	3	50.5031	6.7912	3	4.47208	0.862543	3				20.0503	21.8748	9
		20	55.386	4.05131	3	49.4042	5.6556	3	40.7054	4.22389	3	47.2935	15.2398	3	52.1195	11.588	12
		10	69.808	3.85511	3	56.1265	1.7072	3	44.3498	4.31575	3	96.5254	16.0482	3	51.0853	11.439	12
		5	74.4967	3.2866	3	58.6021	7.33652	3	68.1025	3.01814	3	94.8628	6.7879	3	60.3604	8.14901	12
		2.5	79.1303	1.91786	3	81.4253	11.8124	3	97.3711	4.19045	3	114.352	61.7351	3	77.378	10.6876	12
		1.25	94.32	5.87506	3	98.9314	7.01986	3	107.115	2.94288	3	95.8247	17.2018	3	90.1098	7.38953	12
		0.625	96.615	4.74197	3	93.6608	4.60768	3	114.711	5.89702	3	108.452	26.8422	3	91.4961	10.8184	12
		0.3125	95.7083	0.53966	3	116.394	3.76839	3	114.114	14.1608	3	105.08	10.9524	3	97.8648	12.2571	12
		0.15625	102.178	3.9397	3	107.426	9.71121	3	101.608	8.08971	3	95.9835	17.2211	3	93.3635	7.17857	12
			Ag@NO2			Ag@NO2			Ag@NO2			Ag@NO2			Ag@NO2
			Mean exp 1	SD exp 1	n exp 1	Mean exp 2	SD exp 2	n exp 2	Mean exp 3	SD exp 3	n exp 3	Mean exp 4	SD exp 4	n exp 4	Mean all exp	SD all exp	n all exp
		40	53.7448	4.68547	3	85.0768	3.03317	3	24.8797	13.3742	3				33.6962	18.1738	6
		20	68.7734	0.858564	3	80.0978	8.53629	3	36.9088	6.17514	3	25.0294	25.4971	3	48.1779	20.9749	9
		10	84.9951	4.51527	3	73.6586	9.43848	3	52.7167	10.2606	3	52.6586	51.3295	3	68.8363	19.0482	9
		5	89.517	8.09361	3	94.9074	10.9988	3	48.7742	12.7416	3	110.926	4.73026	3	90.0805	24.2721	9
		2.5	78.3808	7.22634	3	107.974	12.4359	3	76.5188	6.23194	3	113.547	14.5944	3	96.5635	6.12069	9
		1.25	89.9102	5.51721	3	112.953	12.7153	3	85.1352	2.50242	3	100.839	21.5013	3	98.6877	4.63908	9
		0.625	88.4425	10.0514	3	117.809	7.86274	3	98.4668	7.39071	3	113.715	16.2708	3	107.294	9.61287	9
		0.3125	88.7175	4.96943	3	111.426	10.7774	3	100.098	7.16664	3	109.074	13.1729	3	106.253	8.32325	9
		0.15625	90.4331	7.3499	3	124.181	9.43026	3	100.117	6.78987	3	95.454	11.7256	3	101.91	8.25718	9
			Ag@CN@NO2@CCH			Ag@CN@NO2@CCH			Ag@CN@NO2@CCH			Ag@CN@NO2@CCH (N=9)
			Mean exp 1	SD exp 1	n exp 1	Mean exp 2	SD exp 2	n exp 3	Mean exp 3	SD exp 3	n exp 3	Mean	SD	n all exp
		40	64.9566	4.07552	3	50.0833	9.40505	3	24.8899	17.0687	3	41.9789	20.1683	9
		20	81.9859	9.21751	3	52.5777	5.89812	3	55.4903	5.27188	3	57.0162	15.2906	9
		10	98.4113	1.94627	3	42.0466	4.44249	3	59.9146	3.87264	3	60.1118	25.1378	9
		5	102.641	5.63662	3	59.8192	8.53482	3	66.2246	12.2124	3	68.6054	21.5302	9
		2.5	80.2594	3.20454	3	72.2455	9.20214	3	91.9912	8.62624	3	73.3488	10.7847	9
		1.25	99.3979	9.95954	3	64.975	7.70149	3	115.32	5.37635	3	83.9077	23.3127	9
		0.625	103.296	3.53066	3	60.1329	5.40486	3	113.017	6.41007	3	82.9338	24.7987	9
		0.3125	113.121	6.98809	3	60.3461	7.38135	3	123.169	0.497657	3	88.9909	29.6648	9
		0.15625	100.623	10.7474	3	68.7822	21.2663	3	136.499	24.4893	3	91.7714	33.9513	9

## Sheet: 6) data used in Graphpad Prism 
Normalized viability (% of Control no treatment)
			Experiment 1												Experiment 2									Experiment 3												Experiment 4
			Ag@CCH			Ag@CN			Ag@NO2			Ag@CN@NO2@CCH			Ag@CCH			Ag@CN			Ag@CN@NO2@CCH			Ag@CCH			Ag@CN			Ag@NO2			Ag@CN@NO2@CCH			Ag			Ag CCH			Ag CN			Ag NO2
	µg /ml	40	49.8558	28.6115	45.5063	18.2682	6.92974	10.3798	58.9102	49.7684	52.5557	65.5599	60.613	68.6968	41.2414	50.6755	45.6915	42.7109	53.6367	55.1618	60.8673	45.8025	43.5803	19.8412	40.7693	42.0917	5.45594	4.11431	3.84599	9.48889	33.6757	31.4744	44.5969	15.2934	14.7793
		20	28.112	46.3948	56.3262	60.0447	52.6884	53.4249	69.6811	67.9743	68.6649	73.4453	91.7568	80.7555	61.0757	53.8931	44.4712	54.8185	49.8592	43.5348	57.0128	54.8361	45.8841	38.4691	36.8981	42.5401	36.4398	44.8863	40.7903	32.9858	33.7137	44.0268	57.4071	49.5282	59.5357	10.2841	8.22829	7.03603	103.204	103.841	103.881	54.9843	81.9764	51.986	6.94181	54.9454	54.6672
		10	79.8966	74.4223	84.5553	67.2662	74.2437	67.9139	82.0128	90.1899	82.7825	100.018	98.9694	96.247	59.272	57.7201	57.225	55.0512	55.2333	58.095	47.1728	39.649	39.318	46.4998	45.7099	51.7156	40.7166	43.2124	49.1203	42.0345	53.6196	62.496	58.2892	57.1196	64.3351	14.9122	11.1428	14.6657	150.062	112.798	117.654	136.333	108.02	104.672	89.2046	111.345	5.84223
		5	73.8322	73.3941	71.2201	78.2279	72.0309	73.2313	93.6021	94.754	80.195	102.081	97.3054	108.537	90.4562	89.4724	78.8968	64.9899	60.2271	50.5894	68.9136	58.56	51.9839	62.0676	59.6481	63.8016	64.7695	70.6509	68.8871	41.833	41.0103	63.4792	80.3262	59.1266	59.2211	28.1253	23.2113	14.7889	93.5088	98.0335	105.363	119.445	118.094	106.081	134.532	135.273	126.046
		2.5	84.8073	83.146	78.6494	77.7351	78.3385	81.3173	84.9128	79.6114	70.6182	76.6032	81.5941	82.5809	94.9441	90.7843	79.0926	94.3594	71.2081	78.7084	78.5816	76.4645	61.6903	102.079	96.6648	96.97	93.2795	101.654	97.1799	80.8373	69.3746	79.3446	100.049	93.0328	82.8915	110.8	26.3805	47.6381	92.0814	122.494	92.2562	212.896	98.9202	95.1749	153.051	126.015	125.306
		1.25	95.5645	99.0171	88.6346	100.136	94.4372	88.3873	96.2765	86.5208	86.9333	91.3333	96.33	110.531	111.331	113.239	104.523	92.1975	98.3907	106.206	73.6867	62.1657	59.0725	117.118	109.857	130.463	107.822	103.883	109.639	86.4139	82.2518	86.7399	118.663	109.118	118.178	82.0019	78.668	69.2353	78.1683	87.342	90.8095	135.066	113.773	97.9096	144.805	98.2288	120.019
		0.625	98.8885	99.4868	90.5963	99.0651	99.6307	91.1492	99.4027	86.2696	79.6553	99.7952	103.237	106.856	92.5296	102.934	101.382	88.3832	96.884	95.7151	63.7059	62.7779	53.915	151.517	99.4567	117.278	112.737	110.055	121.342	101.817	89.9943	103.589	108.647	110.028	120.376	82.5013	129.079	111.598	136.423	135.063	90.6493	162.371	117.67	107.763	140.704	115.185	149.03
		0.3125	104.865	100.892	92.4818	95.1151	95.8398	96.1701	94.4557	85.8427	85.854	105.199	115.758	118.408	109.509	116.636	115.472	117.824	119.238	112.12	65.2565	63.9242	51.8576	102.486	106.211	113.144	105.814	130.464	106.062	99.9039	107.36	93.0302	123.665	123.172	122.67	86.3266	96.6385	110.511	101.231	104.059	126.275	136.587	127.242	113.014	126.263	145.699	117.865
		0.15625	95.4558	102.003	95.6169	106.356	98.53	101.648	98.1173	89.7111	83.4708	88.3227	105.35	108.197	88.1951	106.883	100.512	101.912	118.639	101.727	92.0969	63.801	50.4485	114.068	114.308	101.382	109.215	93.1096	102.499	92.3514	104.936	103.063	113.214	162.037	134.247	84.0806	88.0451	96.1773	98.2346	89.0951	92.5793	105.422	137.301	104.541	129.78	109.17	106.592
			Ag@ (N=3)			Ag@CCH (N=9)			Ag@CN (N=9)			Ag@NO2 (N=6)			Ag@CN@NO2@CCH (N=9)
			Mean	SD	n	Mean	SD	n	Mean	SD	n	Mean	SD	n	Mean	SD	n
	µg /ml	40				40.476	10.0894	9	20.0503	21.8748	9	33.6962	18.1738	9	41.9789	20.1683	9
		20	8.51613	1.64305	3	59.9255	27.8163	12	52.1195	11.588	12	48.1779	20.9749	12	57.0162	15.2906	9
		10	13.5736	2.10873	3	78.1275	32.9667	12	51.0853	11.439	12	68.8363	19.0482	12	60.1118	25.1378	9
		5	22.0418	6.74469	3	79.9745	15.1002	12	60.3604	8.14901	12	90.0805	24.2721	12	68.6054	21.5302	9
		2.5	61.6064	43.9092	3	92.8307	11.8889	12	77.378	10.6876	12	96.5635	6.12069	12	73.3488	10.7847	9
		1.25	76.6351	6.62164	3	102.172	14.9448	12	90.1098	7.38953	12	98.6877	4.63908	12	83.9077	23.3127	9
		0.625	107.726	23.5289	3	109.684	20.5101	12	91.4961	10.8184	12	107.294	9.61287	12	82.9338	24.7987	9
		0.3125	97.8255	12.136	3	107.772	8.98795	12	97.8648	12.2571	12	106.253	8.32325	12	88.9909	29.6648	9
		0.15625	89.4344	6.16684	3	99.8609	8.59305	12	93.3635	7.17857	12	101.91	8.25718	12	91.7714	33.9513	9

## Sheet: 7) 6-well plate cytotoxicity
Cytotoxicity assay Hela cells in 6 well plate
RAW DATA
		Ag@CCH 2µg/ml	Ag@CN 2µg/ml	Ag@CCH 20µg/ml	Ag@CN 20µg/ml	Ag@NO2 2µg/ml	NT	Blank
Fluorescence Intensity Ex 530 nm / Em 590 nm		126730200	92688008	65900560	61289880	120334672	144712576	22675
		130674888	91058320	64585524	58881072	111111952	138596720	32871
		133617280	91651240	61690488	58011156	117392128	136068960	14477
							Mean	23341
Mean Blank removal
		Ag@CCH 2µg/ml	Ag@CN 2µg/ml	Ag@CCH 20µg/ml	Ag@CN 20µg/ml	Ag@NO2 2µg/ml	NT
Fluorescence Intensity Ex 530 nm / Em 590 nm		126706859	92664667	65877219	61266539	120311331	144689235
		130651547	91034979	64562183	58857731	111088611	138573379
		133593939	91627899	61667147	57987815	117368787	136045619
						Mean	139769411
Normalized to No treatment (%)
		Ag@CCH 2µg/ml	Ag@CN 2µg/ml	Ag@CCH 20µg/ml	Ag@CN 20µg/ml	Ag@NO2 2µg/ml
Normalized viability (% of Control no treatment)		90.6542	66.2982	47.1328	43.834	86.0784
		93.4765	65.1323	46.1919	42.1106	79.4799
		95.5817	65.5565	44.1206	41.4882	83.9732
Mean, SD and n		Ag@CCH		Ag@CN		Ag@NO2
		2µg/ml	20µg/ml	2µg/ml	20µg/ml	2µg/ml
Normalized viability (% of Control no treatment)	Mean	93.2375	45.8151	65.6623	42.4776	83.1772
	SD	2.47241	1.54103	0.590155	1.21521	3.37051

## Sheet: 8) Fib Cytox Replicate 1
Cytotoxicity of NPS on Fibroblasts
Replicate 1
RAW DATA
Fluorescence Intensity Ex 530 nm / Em 590 nm	µg/ml	Ag			Ag CCH			Ag CN			AgNO2
	40	10487405	11075206	10850755	35117620	34993444	41225004	14506935	11998117	18482184	40640392	44283456	47944008
	20	11283633	12646149	14199601	53098352	42683908	40888972	35285808	43660448	42795164	72502064	59780632	67352344
	10	30853160	34030356	36241784	43258304	44808424	47015280	50105728	47397064	56169976	65114192	67916208	63510132
	5	45189944	48416844	50792432	48300532	49840520	51279732	58508568	62995408	59704984	66131472	61049216	68363584
	2.5	57313264	60877380	64886664	55287012	60707676	63938432	54801024	67755488	66367608	69315064	70908256	116138712
	No treatment	71397072	74010040	88673360				74475672	78620256	104765104
	Blank	7888292	9761964					9244579	8350287
	mean blank	8825128						8797433
mean Blank removal
Fluorescence Intensity Ex 530 nm / Em 590 nm	µg/ml	Ag			Ag CCH			Ag CN			AgNO2
	40	1662277	2250078	2025627	26292492	26168316	32399876	5709502	3200684	9684751	31842959	35486023	39146575
	20	2458505	3821021	5374473	44273224	33858780	32063844	26488375	34863015	33997731	63704631	50983199	58554911
	10	22028032	25205228	27416656	34433176	35983296	38190152	41308295	38599631	47372543	56316759	59118775	54712699
	5	36364816	39591716	41967304	39475404	41015392	42454604	49711135	54197975	50907551	57334039	52251783	59566151
	2.5	48488136	52052252	56061536	46461884	51882548	55113304	46003591	58958055	57570175	60517631	62110823	107341279
	No treatment	62571944	65184912	79848232				65678239	69822823	95967671
	mean No treatment	69201696						7.71562e+07
Normalized to No treatment (%)
Normalized viability (% of Control no treatment)	µg/ml	Ag			Ag CCH			Ag CN			AgNO2
	40	2.40208	3.25148	2.92713	37.994	37.8146	46.8195	7.39992	4.14831	12.5521	41.2707	45.9924	50.7368
	20	3.55267	5.52157	7.76639	63.9771	48.9277	46.3339	34.3308	45.185	44.0635	82.5657	66.0779	75.8913
	10	31.8316	36.4228	39.6185	49.7577	51.9977	55.1867	53.5385	50.0279	61.3982	72.9905	76.6222	70.9116
	5	52.549	57.2121	60.6449	57.044	59.2693	61.3491	64.4292	70.2444	65.9798	74.309	67.722	77.202
	2.5	70.0678	75.2182	81.0118	67.1398	74.9729	79.6416	59.6239	76.4138	74.6151	78.4352	80.5001	139.122
Mean, SD and n
Normalized viability (% of Control no treatment)			µg/ml	40	20	10	5	2.5
		Ag@	Mean	2.86023	5.61354	35.9577	56.802	75.4326
			SD	0.428636	2.10837	3.91421	4.06349	5.47513
			n	3	3	3	3	3
		Ag@CCH	Mean	40.876	53.0796	52.314	59.2208	73.9181
			SD	5.14798	9.52623	2.7283	2.15296	6.31727
			n	3	3	3	3	3
		Ag@CN	Mean	8.03346	41.1931	54.9882	66.8845	70.2176
			SD	4.23758	5.96929	5.82213	3.01133	9.21837
			n	3	3	3	3	3
		Ag@NO2	Mean	46	74.845	73.5081	73.0777	99.3524
			SD	4.73301	8.2936	2.89026	4.85844	34.4569
			n	3	3	3	3	3

## Sheet: 9) Fib Cytox Replicate 2
Cytotoxicity of NPS on Fibroblasts
Replicate 1
RAW DATA
Fluorescence Intensity Ex 530 nm / Em 590 nm	µg/mL	Ag@CCH			Ag@CN			Ag@NO2
	20	14836627	26362784	23595324	136188080	118376920	76572624	135727024	148598752	161042336
	10	76845104	99936968	99598312	128669440	137836000	143928240	139169088	120271256	144718976
	5	140353216	148523856	152003840	142134592	140105920	129322040	138687184	129981240	133221408
	2.5	144675568	151034736	157815568	142979168	138753216	146334544	134129176	134658112	134581856
	1.25	149747552	154902464	161531952	142690320	139096064	144721696	135996864	129056664	134704496
	0.625	157144832	155717376	152418192	144350672	153128288	155967744	133038384	138413728	142716016
	0	149554352	139688224	153725664	154642496	157309312	159775616	155264496	153097568	152934848
	Blank	12740810	15818257
	mean Blank	1.42795e+07
mean Blank removal
Fluorescence Intensity Ex 530 nm / Em 590 nm	µg/mL	Ag@CCH			Ag@CN			Ag@NO2
	20	557094	1.20833e+07	9.31579e+06	1.21909e+08	1.04097e+08	6.22931e+07	1.21447e+08	1.34319e+08	1.46763e+08
	10	6.25656e+07	8.56574e+07	8.53188e+07	1.1439e+08	1.23556e+08	1.29649e+08	1.2489e+08	1.05992e+08	1.30439e+08
	5	1.26074e+08	1.34244e+08	1.37724e+08	1.27855e+08	1.25826e+08	1.15043e+08	1.24408e+08	1.15702e+08	1.18942e+08
	2.5	1.30396e+08	1.36755e+08	1.43536e+08	1.287e+08	1.24474e+08	1.32055e+08	1.1985e+08	1.20379e+08	1.20302e+08
	1.25	1.35468e+08	1.40623e+08	1.47252e+08	1.28411e+08	1.24817e+08	1.30442e+08	1.21717e+08	1.14777e+08	1.20425e+08
	0.625	1.42865e+08	1.41438e+08	1.38139e+08	1.30071e+08	1.38849e+08	1.41688e+08	1.18759e+08	1.24134e+08	1.28436e+08
	0	1.35275e+08	1.25409e+08	1.39446e+08	1.40363e+08	1.4303e+08	1.45496e+08	1.40985e+08	1.38818e+08	1.38655e+08
	mean 0	1.33377e+08			1.42963e+08			1.39486e+08
Normalized to No treatment (%)
Normalized viability (% of Control no treatment)	µg/mL	Ag@CCH			Ag@CN			Ag@NO2
	20	0.417685	9.0595	6.98458	85.2728	72.8142	43.5729	87.0678	96.2958	105.217
	10	46.909	64.2223	63.9684	80.0137	86.4255	90.6869	89.5355	75.9873	93.5143
	5	94.5246	100.651	103.26	89.4323	88.0133	80.4702	89.19	82.9486	85.2715
	2.5	97.7653	102.533	107.617	90.0231	87.0671	92.3701	85.9223	86.3015	86.2468
	1.25	101.568	105.433	110.404	89.821	87.3069	91.2419	87.2613	82.2857	86.3347
	0.625	107.114	106.044	103.57	90.9824	97.1222	99.1083	85.1403	88.994	92.0783
	0	101.423	94.026	104.551	98.1814	100.047	101.772	101.075	99.521	99.4044
Mean, SD and n
Normalized viability (% of Control no treatment)		µg/ml	20	10	5	2.5	1.25	0.625
	Ag@CCH	Mean	5.48726	58.3665	99.4783	102.639	105.802	105.576
		SD	4.51129	9.92335	4.48401	4.92675	4.42923	1.81764
		n	3	3	3	3	3
	Ag@CN	Mean	67.22	85.7087	85.9719	89.8201	89.4566	95.7377
		SD	21.4054	5.37261	4.8172	2.65732	1.99266	4.2362
		n	3	3	3	3	3
	Ag@NO2	Mean	96.1935	86.3457	85.8033	86.1569	85.2939	88.7375
		SD	9.07493	9.18858	3.15453	0.204982	2.64604	3.47613
		n	3	3	3	3	3
